# Supplementary material for: Relationship between heart rate variability parameters and inflammatory activity in patients with Crohn’s disease: a retrospective study
Source: PeerJ journal article supplement (doi:10.7717/peerj.19893), 2025-08-18
Supplement: DATA.zip [file DATA.zip]

## Sheet: HRV
ID	GENDER	AGE	A	LOCA	BEHA	EDU	MARR	STAGE	CDAI	BMI	TP	LF	HF	SDNN	HR	WBC	CRP	ALB	DRUG	OPER	COURSE
1	1	36	2	3	1	3	1	1	153	18.04	825.42	117.37	299.96	30.94	81.98	9.73	16.5	35.7	2	0	3
2	2	52	3	3	3	1	1	1	279	20.44	134.23	47.76	7.09	12.68	101.35	11.89	185.8	30.4	2	1	6
3	1	20	2	3	1	1	0	1	181	19.27	1771.67	655.18	458.92	44.13	83.19	6.84	13.4	34.8	1	0	1
4	2	18	2	3	1	2	0	1	206	19	3247.56	441.51	1181.98	67.24	72.44	8.55	36	34.5	1	0	1
5	1	28	1	1	1	3	0	1	163	17.6	2484.64	366.12	1604.67	62.22	69.77	4.67	1.01	37.2	2	0	12
6	1	29	2	2	1	3	0	1	184	21.5	2664.27	687.61	575.03	54.73	79.81	6.1	8.6	37.2	2	0	4
7	1	38	2	3	2	3	0	1	336	14.87	340.03	66.27	25.87	20.85	79.45	5.11	30.5	18.7	1	0	6
8	1	21	2	3	1	2	0	1	165	18.7	170.28	60.74	5.58	14.5	99.06	8.16	105.5	26.4	1	0	3
9	1	25	2	3	1	2	0	1	472	13.5	14.51	8.2	1.43	4.59	135.76	13.21	40.2	38.2	1	0	1
10	1	48	2	3	3	1	1	1	459	19.3	168.92	33.74	74.75	14.23	84.39	20.47	12.6	41.1	1	1	20
11	1	26	2	3	3	3	0	1	169	19	1216.44	803.72	277.74	34.41	124.44	10.11	9.2	38.3	1	1	3
12	2	49	2	3	3	1	1	1	210	14.7	938.32	198.28	489.82	35.92	72.29	2.17	0.4	39.9	2	1	20
13	2	62	3	1	2	2	1	1	231	18.5	248.69	57.26	56.99	17.43	85.24	4.54	25	22.6	1	1	15
14	1	40	2	1	3	3	1	1	173	22.65	7300.27	3017.04	2314.01	91.36	60.51	11.86	5.9	39.1	2	0	1.5
15	1	29	2	1	2	3	0	1	213	17	1560.05	334.3	586.24	42.2	76.2	5.77	8.2	31.3	1	0	1
16	1	23	2	2	1	3	0	1	186	15.6	871.72	157.41	61.12	32.5	111.18	12.23	128.4	35.4	1	0	5
17	1	49	3	1	2	3	1	1	152	21.3	1032.14	413.97	302.17	34.61	56.83	5.44	8.91	35.2	1	0	9
18	2	22	2	1	1	1	0	1	180	19.05	999.98	268.13	119.66	34.55	78.51	9.1	5.5	40.4	1	0	1
19	2	22	2	3	1	3	1	1	196	29.59	2331.27	367.92	445.97	55.32	81.11	7.01	37.7	32	1	0	0.3
20	1	19	1	2	1	1	0	1	332	16.6	1321.58	461.68	194.53	39.18	97.17	4.05	21.2	38.1	3	0	18
21	1	45	3	3	1	3	1	1	189	22	1631.88	342.64	321.16	45.35	62.34	7.64	12.9	38.3	1	0	0.5
22	2	21	2	3	3	3	0	1	320	16.43	130.19	31.42	14.35	12.8	120.51	7.44	34.4	33.3	1	0	3
23	1	28	2	3	2	3	0	1	166	18.65	1531.37	601.9	510.54	41.1	75.89	5.17	33.9	34.4	2	1	11
24	1	28	2	1	1	1	1	1	173	16.38	1295.35	447.97	330.74	38.41	85.65	8.18	16.16	37.8	1	0	0.5
25	1	31	2	3	1	3	0	2	116	20.5	2457.63	1282.1	825.05	53.21	79.14	7.59	15.1	42.9	1	0	5
26	1	18	2	1	1	2	0	2	69	22.04	6669.59	3070.06	794.93	86.01	76.3	7.06	0.4	44.7	1	0	1
27	1	19	2	3	1	2	0	2	121	22.65	4309.92	1996.1	1013.82	65.26	86.66	5.14	20.6	37	2	0	3
28	1	32	2	3	1	3	1	2	66	20	1502.97	222.32	607.18	52.79	73.97	5.23	0.4	32.9	2	0	0.5
29	2	32	2	3	1	3	1	2	90	23.39	837.24	220.19	152.11	30.49	74.26	4.41	0.5	38.9	2	0	2
30	1	23	2	3	1	3	0	2	104	17.65	1818.64	436.52	563.94	44.99	75.06	6.69	4.4	42.1	2	0	2
31	1	18	2	3	1	2	0	2	108	20.1	473.29	175.65	71.33	23.23	104.63	6.21	1.4	44.6	2	0	1.5
32	1	21	1	4	1	3	0	2	74	16.65	3004.24	530.26	1561.17	57.28	79.26	9.9	22.5	36.2	2	0	7
33	2	24	2	3	3	3	0	2	134	16.6	1446.23	202.73	460.36	41.09	95.16	7.64	5.4	36.1	1	1	3
34	1	33	2	2	3	1	1	2	104	17.63	607.28	138.74	304.58	34.54	89.71	8.92	40.88	37.9	1	1	7
35	1	55	3	3	2	2	1	2	90	20.76	193.87	63.1	29.63	16.93	96.62	10.49	14.1	33.5	2	1	1
36	2	44	2	1	2	2	1	2	98	20.63	1619.13	347.6	439.5	44.88	72.23	5.79	2.8	36.4	3	1	19
37	2	20	2	3	1	3	0	2	137	19.98	4178	1204.7	1931.65	64.89	88.61	9.76	34.8	33.3	2	0	3
38	2	20	2	3	1	3	0	2	94	19.8	3424.87	532.02	235.18	65.19	82.12	6.73	4.53	35.3	2	0	2
39	1	38	2	3	1	3	1	2	49	25.39	2228.96	615.73	136.67	50.1	76.81	7.75	1.9	42.2	2	0	5
40	1	45	3	3	2	2	1	2	84.6	19.4	246.68	56.35	44.69	16.82	112.93	7.24	19.9	30.79	2	0	3
41	2	66	3	4	1	1	1	2	133	22.9	207.18	57.58	37.86	15.42	98.73	4.12	0.3	37.86	3	0	6
42	1	25	2	3	1	2	0	2	80	20.4	6805.31	2241.35	3383.23	85.45	73.52	7.7	0.8	40	2	0	3
43	1	31	2	3	3	3	1	1	181	15.3	513.31	138.95	196.89	23.8	80.44	6.8	13	38.66	2	1	9
44	2	32	2	3	1	3	1	1	200	22.5	1794.57	743.54	345.51	43.84	85.52	7.8	26.4	27.7	1	0	1.5
45	2	23	2	3	1	2	0	1	283.6	13.9	226.57	88.95	66.53	17.11	107.22	9.52	3.62	39.5	2	0	4
46	1	18	2	3	1	2	0	1	311	15.2	322.26	129.11	103.44	18.69	113.28	5.27	66.3	25.3	2	0	1.5
47	1	24	2	3	1	3	1	1	379	23.6	48.9	20.08	3.92	7.82	110.07	7.72	92.1	22.5	1	0	0.5
48	1	22	1	3	1	3	0	1	261.4	18.1	211.91	37.31	24.38	16.85	107.74	13.05	139.1	32.7	1	0	8
49	1	19	2	1	1	3	0	2	55.3	22.9	8819.23	3247.36	2823.67	99.28	58.27	6.93	5.2	37.1	3	0	1.5
50	1	25	2	3	1	3	0	1	279	19.8	97.48	38.25	9.16	10.5	97.86	10.15	69.5	32	1	0	0.3
51	2	27	2	3	2	2	1	1	183.9	16	951.41	398.9	275.8	32.84	84.98	7.12	2.3	26.7	2	0	1
52	1	29	2	3	3	2	0	2	128	17.3	3936.73	604.36	2782.43	67.98	59.1	5.69	31.5	31.5	2	1	5
53	1	24	2	3	3	3	0	2	108	16.4	772.16	376.97	56.03	28.63	85.47	5.86	8.1	40.35	1	1	0.3
54	2	26	2	1	3	3	0	1	292.5	16.2	1233.56	282.56	454.85	37.69	87.54	11.48	108.7	32.06	1	0	0.5
55	2	55	3	3	1	1	1	1	390.87	16	392.45	49.49	37.33	22.39	63.38	2.75	0.5	42.37	3	0	2
56	1	38	2	3	2	1	1	2	139.42	18.9	478.17	186.38	23.66	23.24	97.24	8.22	1.1	42.22	1	1	1
57	1	23	2	3	3	3	0	1	207	17.4	328.26	71.46	122.9	27.13	110.21	11.56	56.7	35.7	1	0	2
58	2	22	2	1	1	3	1	1	179.6	17.5	1137.52	151.18	305.24	39.37	103.81	8.59	5.6	46.1	1	1	0.5
59	1	35	2	2	1	3	1	2	140	17.3	2344.82	277.79	1084.11	53.06	75.54	5.2	0.4	43.6	1	1	10
60	1	28	2	2	1	3	0	2	85.6	19.7	2604.12	970.13	596.81	52.91	73.87	7.39	5.1	41.2	1	0	2
61	1	34	2	1	2	2	1	2	13.86	24.2	981.89	344.86	352.96	33.12	83.13	5.27	0.5	43.43	2	0	15
62	1	40	2	4	2	3	1	1	216.5	16.3	632.07	140.08	184.18	27.6	82.08	3.13	0.4	43.63	2	0	5
63	2	21	2	1	1	3	0	2	20	34.1	436.27	74.12	83.12	22.68	92.43	11.38	1.3	40.21	2	0	1.6
64	1	20	2	3	1	3	0	1	284.5	16.4	1209.99	328.28	411.22	53.72	99.31	8.59	17	39.68	1	1	2
65	1	20	2	3	1	3	0	1	156	18.6	2322.29	629.35	914.08	56.14	67.05	4.68	1.4	38.12	1	1	1.8
66	1	33	2	3	1	3	0	1	238.7	16.6	88.89	18.96	5.85	10.56	106.83	10.39	65.3	32.6	1	0	0.7
67	1	36	2	3	1	1	0	2	117	21.1	7113.03	954.04	4166.33	90.34	55.75	4.85	5.2	40	2	1	13
68	1	24	2	1	3	3	0	1	219.7	15.2	238.74	58.7	34.68	18.4	94	15.12	63.7	35.45	1	1	6
69	1	45	3	3	1	2	1	1	290	19.9	310.81	104.28	34.86	18.68	84.83	5.08	24.8	32	1	0	0.5
70	1	28	2	3	3	3	0	1	319.09	15.9	407.85	78.77	173.24	36.74	107.24	10.66	51.6	31.6	1	0	1
71	1	44	2	3	3	2	0	1	212.97	18.8	473.74	198.43	22.49	22.45	82.55	4.91	4.97	34.11	1	1	19
72	1	29	2	1	1	3	0	1	334.74	21	1884.67	714.58	567.98	45.23	81.43	4.91	0.5	42.65	1	1	7
73	1	15	1	3	1	1	0	2	138	15.56	1664.39	630.25	574.97	48.22	95.12	4.18	0.4	19.97	2	0	0.8
74	1	16	1	1	1	1	0	2	72	17.1	1815.11	378.64	209.21	47.43	67.53	7.17	4.15	22.94	2	0	2
75	1	15	1	1	1	1	0	1	198	18.82	4938.02	1964.28	275.96	73.79	83.37	5.08	1.8	43	1	0	2
76	1	14	1	1	1	1	0	2	76	18.75	1413.9	323.02	191.49	41.12	80.53	5.53	5.7	22.03	2	0	2
77	1	13	1	3	1	1	0	1	296.86	13.5	413.64	88.06	230.89	44.09	102.37	8.41	72.7	29.5	1	0	0.5
78	1	17	1	3	2	2	0	1	414.68	16.4	5536.14	3355.58	1054.15	75.67	85.12	7.73	13.8	40.76	1	0	4
79	1	15	1	2	1	2	0	1	240	16.7	4804.11	1133.73	676.59	77.03	71.48	6.81	12.1	39.04	1	1	0.3
80	1	15	1	3	1	1	0	2	82.7	20.5	3370.06	1127.07	1447.7	61.76	59.7	5.84	0.4	40.94	2	0	2
81	2	14	1	3	1	1	0	1	400	15.6	117.84	36.03	4.28	12.22	105.39	9.6	29.8	36.51	1	0	0.25
82	2	14	1	3	1	1	0	1	230.86	15.8	591.95	62.57	396.07	36.86	106.15	6.73	43.4	32.15	1	0	1

## Sheet: HRV_variables
Variable	Code	Label
ID		ID
GENDER		GENDER
	1	male
	2	female
AGE		AGE
A		Age at diagnosis
	1	A1（≤16years）
	2	A2（17-40years）
	3	A3（＞40years）
LOCA		Disease location
	1	L1（ileal）
	2	L2（colonic）
	3	L3（ileocolonic）
	4	L4（upper disease modifier or isolated upper disease）
BEHA		Disease of behavior
	1	B1（ non-stricturing, non-penetrating）
	2	B2（ stricturing）
	3	B3（penetrating）
EDU		Level of education
	1	Under middle school education
	2	Senior high school education
	3	University degree or equivalent
MARR		Marital status
	0	no
	1	yes
STAGE		stage(CDAI＞150，CDAI≤150)
	1	active
	2	remission
CDAI		Crohn's disease activity index
BMI		body mass index
TP		total power
LF		low frequency power
HF		high frequency power
SDNN		standard deviation of R-R intervals
HR		heart rate
WBC		white blood cell
CRP		C-reactive protein
ALB		Albumin
DRUG		Medications for Crohn's disease
	1	Mesalamine
	2	Biologics
	3	Immunomodulators
OPER		History of bowel resection
	0	no
	1	yes
COURSE		Duration of disease
