# Supplementary figures and images for: Relationship between heart rate variability parameters and inflammatory activity in patients with Crohn’s disease: a retrospective study
Source: PeerJ journal article supplement (doi:10.7717/peerj.19893), 2025-08-18

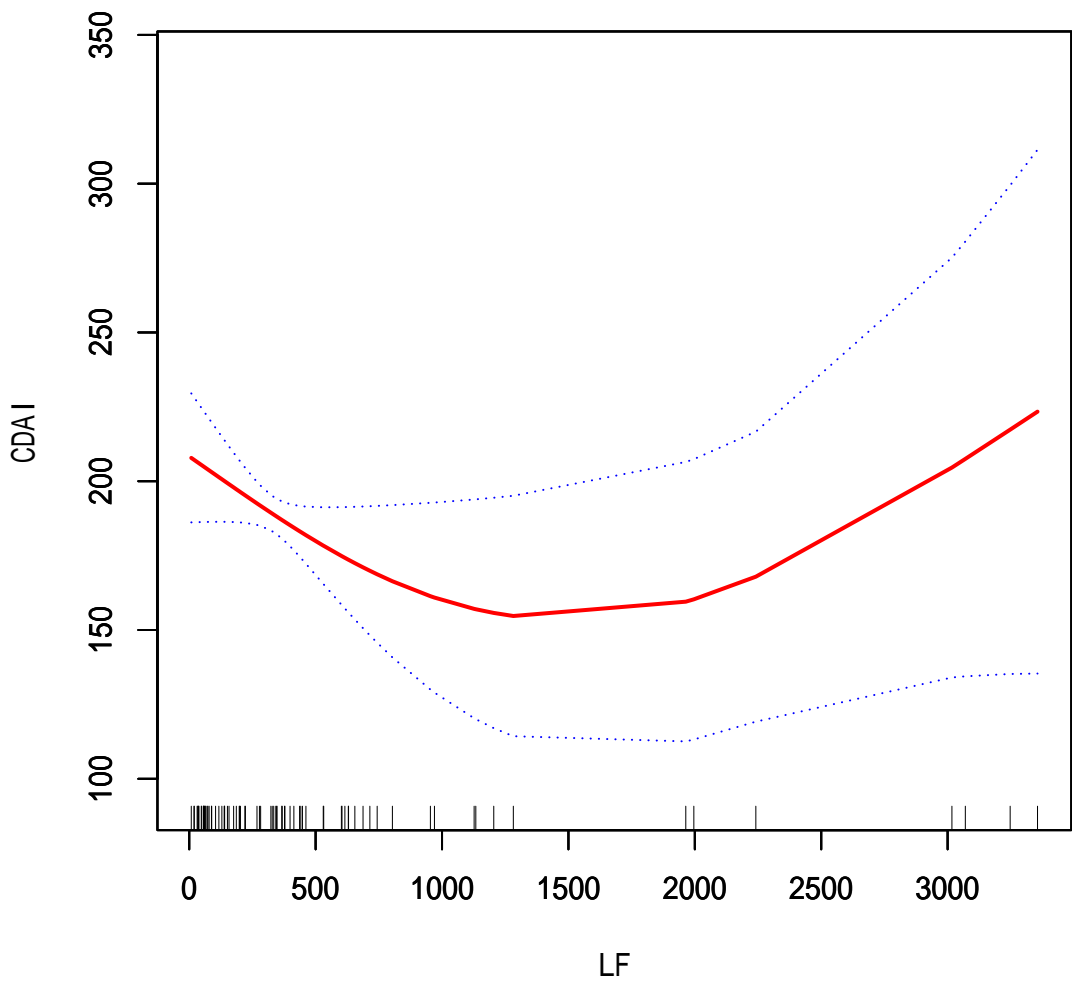

Supplement: DATA.zip [file DATA.zip]

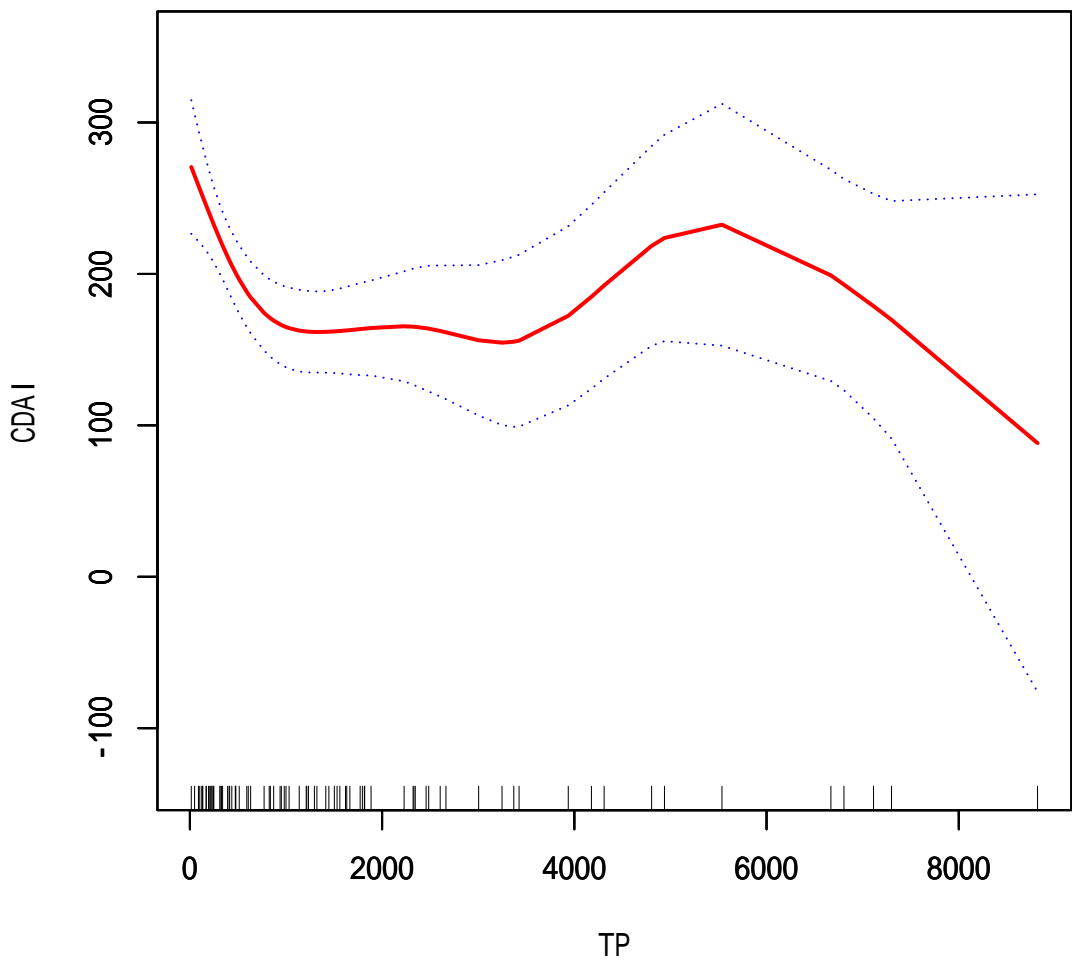

Supplement: DATA.zip [file DATA.zip]

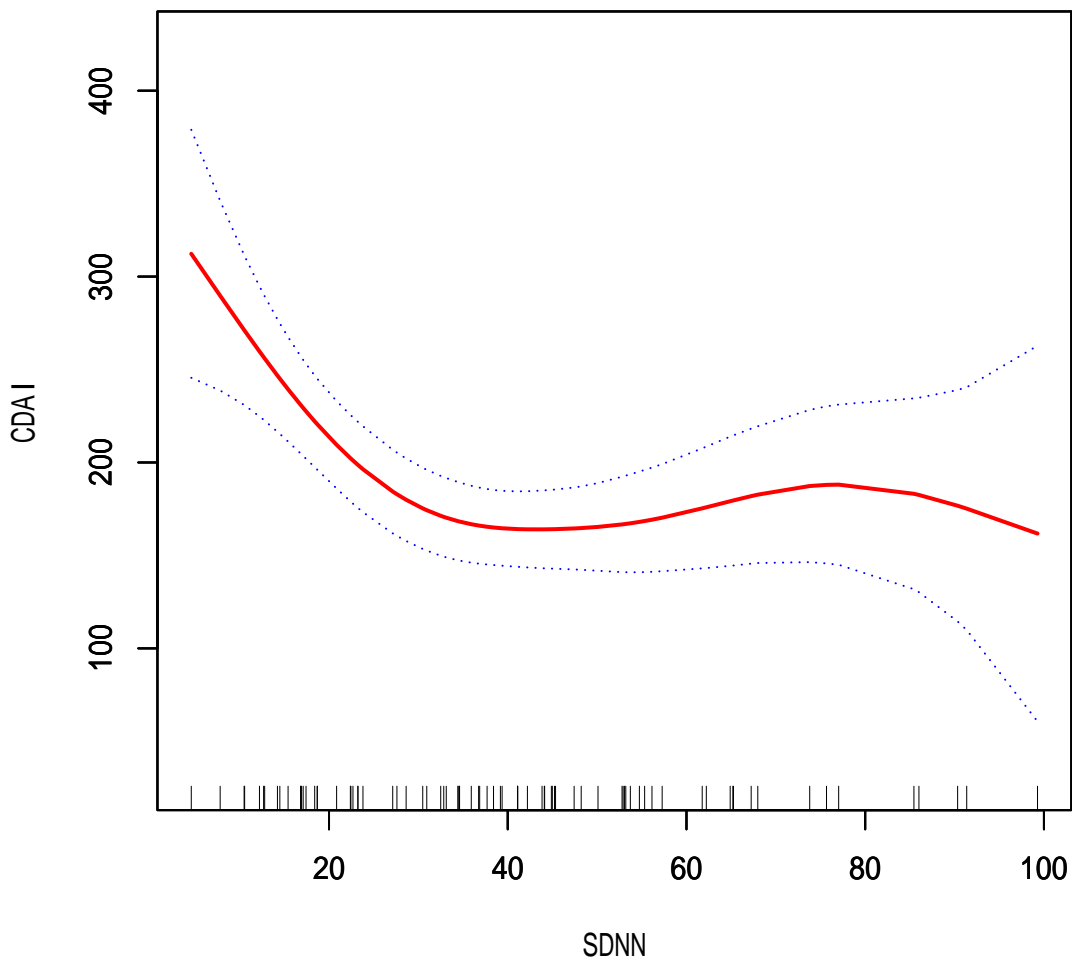

Supplement: DATA.zip [file DATA.zip]

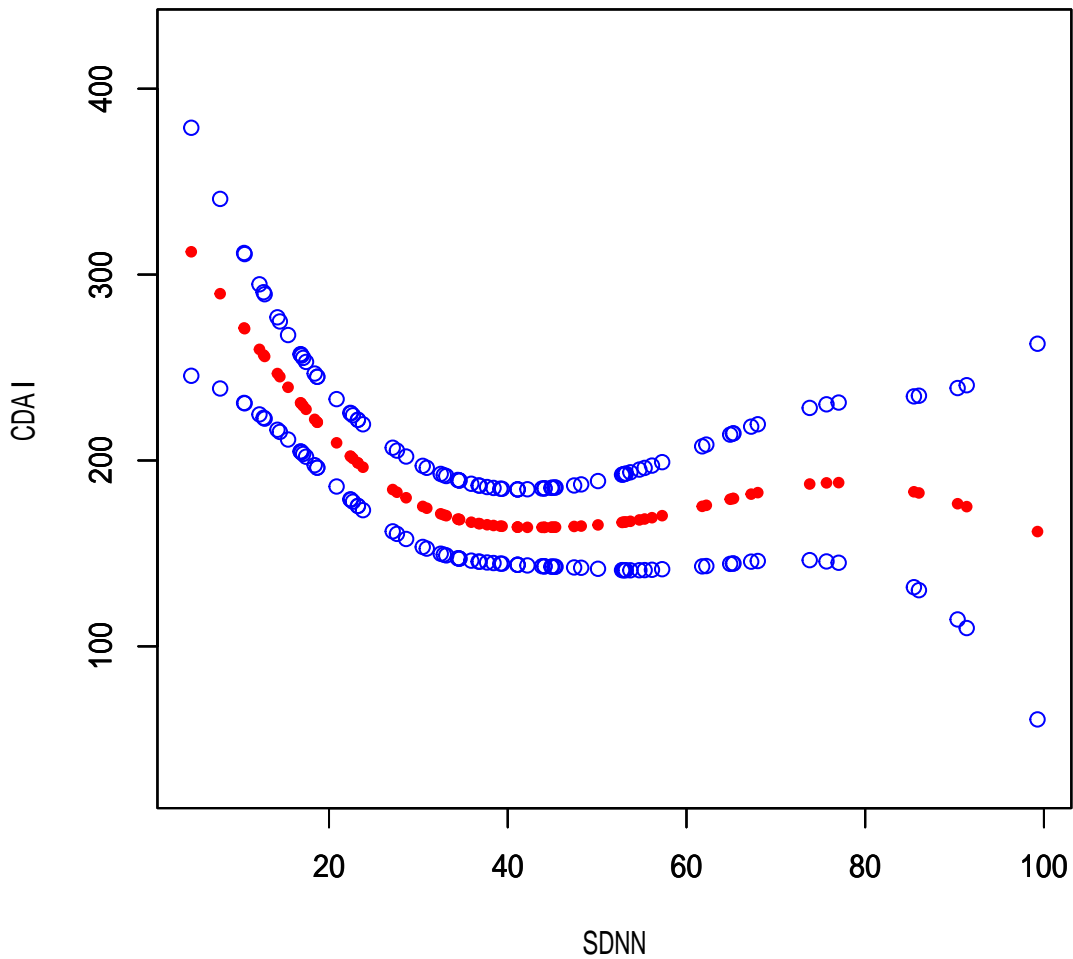

Supplement: DATA.zip [file DATA.zip]

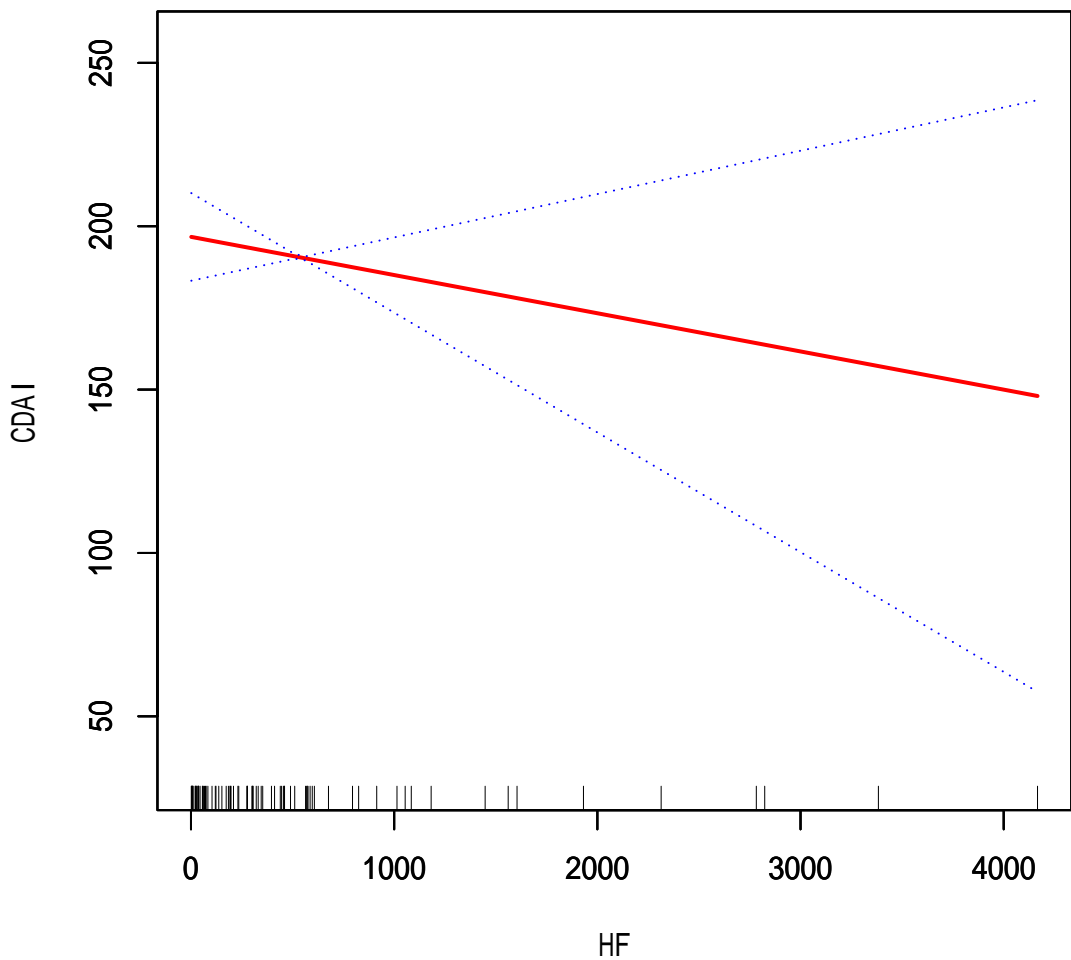

Supplement: DATA.zip [file DATA.zip]

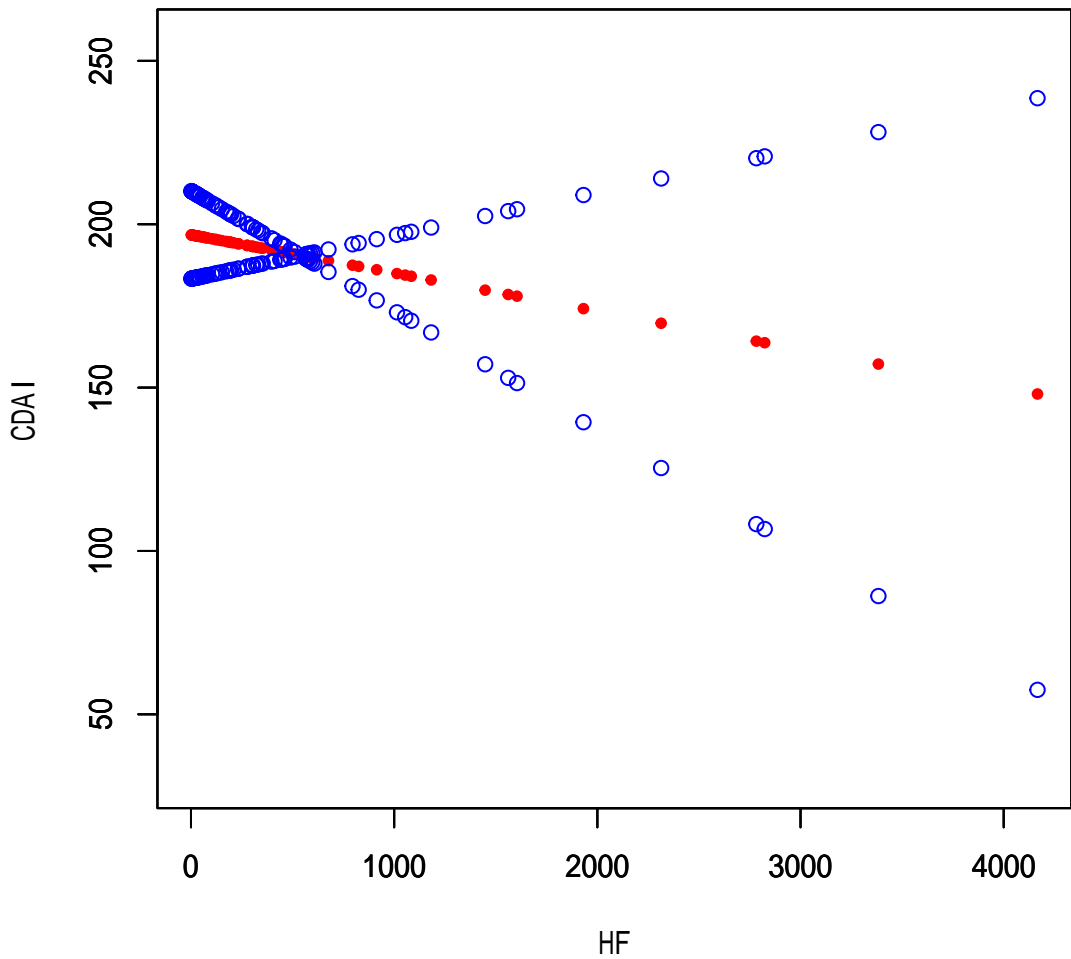

Supplement: DATA.zip [file DATA.zip]

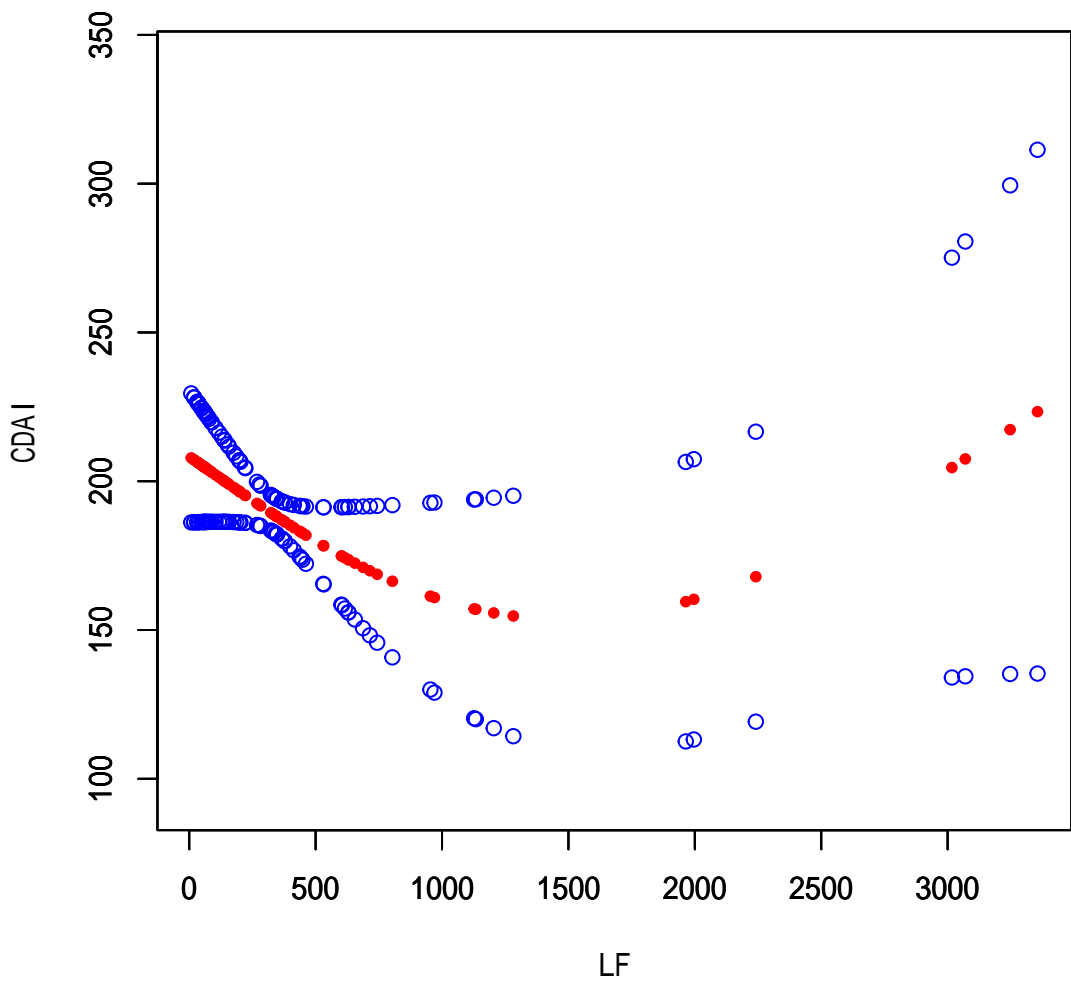

Supplement: DATA.zip [file DATA.zip]

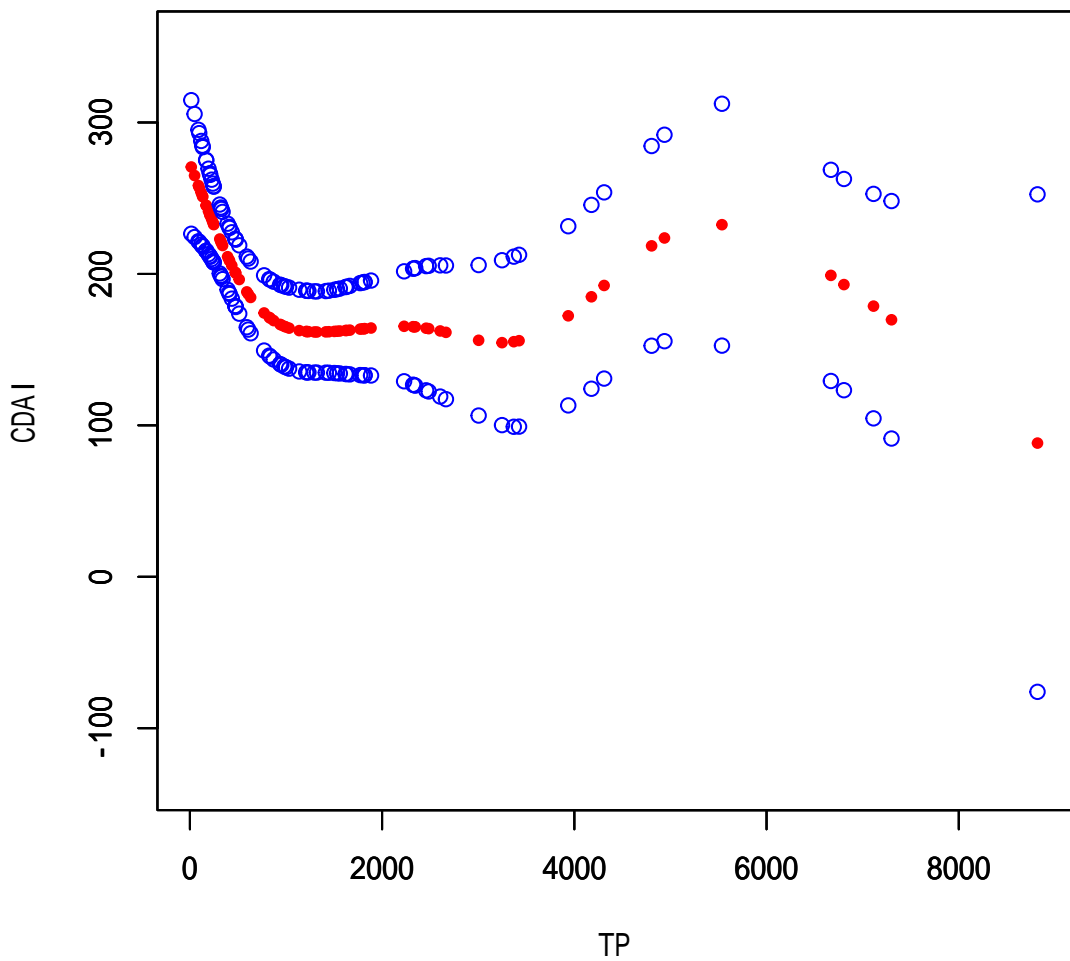

Supplement: DATA.zip [file DATA.zip]
